## RESEARCH ARTICLE

# Changes in health promoting behavior during COVID-19 physical distancing: Utilizing wearable technology to examine trends in sleep, activity, and cardiovascular indicators of health

Emily R. Capodilupo<sup>1</sup>, Dean J. Miller<sup>2\*</sup>

**1** Department of Data Science and Research, Whoop, Inc., Boston, Massachusetts, United States of America, **2** Central Queensland University, Appleton Institute for Behavioral Science, Adelaide, South Australia

\* [d.j.miller@cqu.edu.au](mailto:d.j.miller@cqu.edu.au)

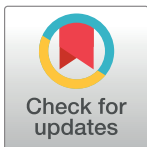

## OPEN ACCESS

**Citation:** Capodilupo ER, Miller DJ (2021) Changes in health promoting behavior during COVID-19 physical distancing: Utilizing wearable technology to examine trends in sleep, activity, and cardiovascular indicators of health. PLoS ONE 16(8): e0256063. <https://doi.org/10.1371/journal.pone.0256063>

**Editor:** Laurent Mourot, University of Bourgogne France Comté, FRANCE

**Received:** June 3, 2020

**Accepted:** July 30, 2021

**Published:** August 12, 2021

**Copyright:** © 2021 Capodilupo, Miller. This is an open access article distributed under the terms of the [Creative Commons Attribution License](https://creativecommons.org/licenses/by/4.0/), which permits unrestricted use, distribution, and reproduction in any medium, provided the original author and source are credited.

**Data Availability Statement:** Public data sharing for these purposes is ethically and legally restricted. The data is collected and used with the consent of individuals who purchase a WHOOP membership (collectively, "WHOOP Members") and agree to the WHOOP terms of use (<https://www.whoop.com/termsfuse/>) and privacy policy (<https://www.whoop.com/privacy/full-privacy-policy/>). While WHOOP terms of use and privacy policy permit WHOOP to use collected data that has been aggregated or de-identified in a manner

## Abstract

The COVID-19 pandemic incited unprecedented restrictions on the behavior of society. The aims of this study were to quantify changes to sleep/wake behavior and exercise behavior, as well as changes in physiological markers of health during COVID-19 physical distancing. A retrospective analysis of 5,436 US-based subscribers to the WHOOP platform (mean age =  $40.25 \pm 11.33$ ; 1,536 females, 3,900 males) was conducted covering the period from January 1st, 2020 through May 15th, 2020. This time period was separated into a 68-day baseline period and a 67-day physical distancing period. To provide context and allow for potential confounders (e.g., change of season), data were also extracted from the corresponding time periods in 2019. As compared to baseline, during physical distancing, all subjects fell asleep earlier (-0.15 hours), woke up later (0.29 hours), obtained more sleep (+0.21 hours) and reduced social jet lag (-0.13 hours). Contrasting sleep behavior was seen in 2019, with subjects falling asleep and waking up at a similar time (-0.01 hours; -0.03 hours), obtaining less sleep (-0.14 hours) and maintaining social jet lag (+0.06 hours) in corresponding periods. Individuals exercised more intensely during physical distancing by increasing the time spent in high heart rate zones. In 2020, resting heart rate decreased (-0.90 beats per minute) and heart rate variability increased (+0.98 milliseconds) during physical distancing when compared to baseline. However, similar changes were seen in 2019 for RHR (-0.51 beats per minute) and HRV (+2.97 milliseconds), suggesting the variation may not be related to the introduction of physical distancing mandates. The findings suggest that individuals improved health related behavior (i.e., increased exercise intensity and longer sleep duration) during physical distancing restrictions. While positive changes were seen to cardiovascular indicators of health, it is unclear whether these changes were a direct consequence of behavior change.

that no longer identifies an individual for informational purposes, analytics or WHOOP's own research purposes, the consent obtained from WHOOP Members does not extend to making the data publicly available for a third party to use for its own purposes. As such, WHOOP's legal department will not permit the data to be shared for these purposes. Data access queries can be directed to the WHOOP Executive team via the Vice President of Performance at WHOOP – Kristen Holmes ([holmes@whoop.com](mailto:holmes@whoop.com)).

**Funding:** The author(s) received no specific funding for this work.

**Competing interests:** The authors have read the journal's policy and have the following competing interests: Emily R. Capodilupo is a shareholder and employee of Whoop, Inc. Whoop, Inc is sponsoring the Research Officership of Dean J. Miller. This does not alter our adherence to all the PLOS ONE policies on sharing data and materials

## Introduction

Severe acute respiratory syndrome coronavirus 2 (SARS-CoV-2), the virus responsible for the COVID-19 pandemic [1], has caused significant social and economic disruptions and has altered the behavior of society. Millions of employees and business owners ceased working or shifted to working from home rather than commuting into offices. Physical distancing protocols put in place to reduce disease transmission also precluded previously common forms of group leisure and athletic activities. Exercise and sleep are two primary behaviors that may have been impacted by COVID-19 restrictions—with individuals confined to their homes and likely experiencing change to work (e.g., loss of employment; reduced commuting) and at-home commitments (e.g., childcare).

Changes in sleep/wake behavior can have meaningful implications on health. Insufficient sleep duration has been shown to correlate with impairments to cognitive performance [2], insulin sensitivity [3] and diabetes [4], cardiovascular disease [5], impairments to mental health [6], and reduced physical performance [7]. Increasing sleep quantity has been shown to counteract many of these effects; for example, increases in sleep quantity have been shown to drive changes in attention [8] and stress hormone expression [9] even within already healthy populations. Changes in sleep timing and the consistency of bedtimes and wake times also have profound effects on wellbeing, with benefits seen when a consistent sleep schedule is maintained [10]. These benefits are understood to be related to the circadian rhythm; shifting sleep timing decouples the circadian rhythm from the sleep/wake rhythm [11, 12], contributing to adverse health outcomes such as higher rates of cardiovascular disease [13] and breast cancer [14].

Physical distancing mandates brought with them temporary closure of gyms, banning of team sports, and cancellations of competitive seasons. For individuals that ordinarily exercise in these public settings, the way in which they obtain their daily exercise may have changed dramatically during the pandemic. Sudden changes in exercise modality, frequency and duration may have a variety of effects on fitness. For example, one study showed that women who participated in multiple exercise modalities had higher muscular endurance than women who participated in only one athletic activity [15]. Sudden changes in the exercise modalities performed by individuals may also result in changes to injury rates and [16] exercise intensity (e.g., transitioning from weight training to running). Therefore, if COVID-19 restrictions do provide more opportunity for exercise, increases in exercise frequency and intensity may result in beneficial cardiovascular adaptations [17]. Understanding how the distribution of time spent in each heart rate zone is perhaps as important as understanding how total exercise and exercise modality changed as a result of the COVID-19 pandemic. In this context, wearable technology can be leveraged to provide unique insight into health related behavior and subsequent health outcomes in large population cohorts.

The WHOOP strap (Whoop, Inc., Boston, MA, USA) is a commercially available wearable device that has been third-party validated to measure sleep, resting heart rate (RHR), heart rate variability (HRV), and respiratory rate [18]. Previous research has shown that metrics such as RHR [19] and HRV [20] are powerful indicators of cardiovascular health. Conditions brought forth by the pandemic create a natural testing ground in which to examine changes in health related behavior and whether these impact cardiovascular indicators of health. The primary aim of this study is to quantify the impact of physical distancing mandates on health related behaviors—specifically sleep timing and duration and exercise frequency, intensity, and modality. This study also explores the physical outcomes of these changes in behavior by examining markers of physical health, including sleep duration, RHR, and HRV.

## Materials and methods

This study conducted a retrospective analysis of health-related behavior before and during COVID-19 physical distancing restrictions. A total of 5,436 WHOOP members based in the United States of America (mean age =  $40.25 \pm 11.33$ ; 1,536 females, 3,900 males) were selected from the WHOOP subscriber-base. Inclusion criteria were (1) having recorded sleeps for at least 120 of the 135 (89%) days between January 1 and March 9 in 2019 and 2020, respectively; and (2) be between the ages of 18 and 80 on May 15th, 2020, when data was extracted for analysis. The study was approved by the Central Queensland University Human Research Ethics Committee. Data were collected with the written consent of individuals via WHOOP Inc's terms of service.

To examine the acute changes in health related behavior, the period between January 1, 2020 and March 9th, 2020 was classified as a baseline period, while the period from March 10th, 2020 through May 15th, 2020 was classified as a physical distancing period. While no single date globally separates pre- and post-physical distancing, delineation of the data on March 9th is based on the rough timeline along which most users would have been subject to some level of physical distancing mandate or recommendation. During the week of March 9th, the World Health Organization officially classified COVID-19 as a pandemic [21] and a National State of Emergency was declared in the United States of America [22]. The May 15th physical distancing end date was chosen such that the physical distancing period analyzed would end before gradual easing physical distancing begins. Additionally, utilizing the chosen dates to represent physical distancing resulted in similar durations of baseline and physical distancing (68 and 67 days, respectively). To provide context for potential confounders (e.g., change in season), data were also extracted from the corresponding dates in 2019.

## Data extraction

The WHOOP strap (Boston, Massachusetts, USA) is a wearable device that collects continuous heart rate, 3-axis accelerometer, temperature, and 3-axis gyroscope data. In combination with the WHOOP mobile device app and cloud-based analytics platform, a series of algorithms evaluate duration and phases of sleep, RHR and HRV. Validation of sleep and cardiovascular measures gleaned from WHOOP against gold standard polysomnography support a low degree of bias and low precision errors [18, 23].

The WHOOP strap is capable of automatically detecting exercise and can automatically identify and classify 54 different modalities. Additionally, users of the WHOOP platform have the ability to manually log exercise that don't meet the algorithm's criteria for automatic detection.

The following variables were obtained from the WHOOP platform:

- Sleep opportunity duration: *total time dedicated to sleep each night. Measured primarily through automatic detection in the WHOOP app. Users are alerted each morning when their automatically detected sleep is ready for review and have the ability to edit the start and stop times should any errors occur.*
- Social jet lag: *the difference between sleep opportunity onset on weekends (Saturday and Sunday) and weekdays (Monday through Friday) resulting from misalignment between social and internal clocks [24].*
- Sleep opportunity onset: *the time that each sleep opportunity was initiated relative to local time zone.*
- Sleep opportunity offset: *the time that each sleep opportunity ended relative to local time zone*

- Sleep duration (hours): *total amount of time spent asleep each night. Measured through automatic detection.*
- Exercise frequency: *daily percentage of individuals that recorded an exercise session.*
- Exercise type—the sport or exercise type chosen for each exercise session. *Labeled automatically by the app via a machine learning algorithm or manually by the WHOOP-user.*
- Exercise intensity: *percentage of exercise duration spent in each of the six heart rate zones—Zone 1 = 0–50% heart rate reserve (HRR); zone 2 = 50–60% HRR, zone 3 = 60–70% HRR, zone 4 = 70–80% HRR, zone 5 = 80–90% HRR, zone 6 = 90–100% HRR. Measured automatically during the exercise session.*
- Resting heart rate (beats per minute; bpm)—*the mean value of heart beats per minute sampled during slow wave sleep. Automatically measured during slow wave sleep each night.*
- Heart rate variability (milliseconds; ms)—*the root-mean-square difference of successive heart-beat intervals sampled during slow wave sleep. Automatically measured during slow wave sleep each night.*

Throughout, dates are assigned to sleeps and exercise based on the local time zone's date in which they end, for example, a sleep beginning in the final hours of January 1st and ending on the morning of January 2nd is attributed to January 2nd.

## Data analysis

Data were analyzed using separate general linear mixed models with the R package lme4 (R Core Team 2016). Models comparing the dependent variables between control and physical distancing periods in 2019 and 2020, respectively, included time period (i.e., BL, PD) as a fixed effect and age, sex and participant as random effects. Analyses for the 2020 time periods were also conducted at the cohort-level with data grouped by age (fixed effect: time period; random effects: sex, participant) and sex (fixed effect: time period; random effects: age, participant). An additional analysis examining changes between the 2020 control and physical distancing periods and corresponding changes in 2019 were conducted with year as a fixed effect and age, sex, and participant as random effects. Differences in daily proportion of exercise frequency were analyzed using independent non-parametric significance tests. Bonferroni corrections were made for all comparisons to reduce the chance of obtaining a type 1 error. To assess the magnitude of the differences between these periods, Cohen's *d* effect sizes and 95% confidence limits for effect size were also calculated. Effect sizes were interpreted as: <0.20 (trivial), 0.2 to 0.59 (small), 0.60 to 1.19 (moderate), 1.20 to 1.99 (large), and >2.0 (very large) [25].

## Results

### Sleep

A summary of sleep/wake behavior for age and gender cohorts are presented in [Table 1](#). In 2020, average sleep opportunity duration was significantly longer during physical distancing when compared to baseline (*large effect size*). During the corresponding time periods in 2019, sleep opportunity duration decreased (*small effect size*). In 2020, average sleep opportunity duration was significantly longer during physical distancing when compared to baseline for 18–25 year-olds (*large effect size*), 25–40 year-olds (*large effect size*), 40–55 year-olds (*moderate effect size*), 55–80 year-olds (*moderate effect size*), females (*large effect size*) and males (*moderate effect size*) ([Table 1](#)).

Table 1. Sleep/wake behavior as a function of time period.

| Variable                              | Time period     |                            | Outcomes                  |                      |
|---------------------------------------|-----------------|----------------------------|---------------------------|----------------------|
|                                       | Baseline (M±SD) | Physical distancing (M±SD) | Difference (PD-BL; M±SEM) | Effect size (95% CL) |
| <b>Sleep opportunity duration (h)</b> |                 |                            |                           |                      |
| 2019                                  | 7.70 ± 0.21     | 7.64 ± 0.19                | -0.05 ± 0.003**           | -0.30 (-0.34, -0.30) |
| 2020                                  | 7.65 ± 0.20     | 7.89 ± 0.18                | 0.24 ± 0.003**            | 1.26 (1.22, 1.30)    |
| 18–25 year-olds                       | 7.83 ± 0.16     | 8.14 ± 0.16                | 0.31 ± 0.009**            | 1.94 (1.77, 2.10)    |
| 25–40 year-olds                       | 7.66 ± 0.19     | 7.93 ± 0.19                | 0.27 ± 0.004**            | 1.42 (1.36, 1.48)    |
| 40–55 year-olds                       | 7.56 ± 0.25     | 7.78 ± 0.21                | 0.21 ± 0.005**            | 0.95 (0.89, 1.02)    |
| 55–80 year-olds                       | 7.75 ± 0.19     | 7.90 ± 0.17                | 0.15 ± 0.007*             | 0.83 (0.72, 0.94)    |
| Females                               | 7.80 ± 0.20     | 8.07 ± 0.18                | 0.27 ± 0.005**            | 1.42 (1.35, 1.49)    |
| Males                                 | 7.59 ± 0.20     | 7.81 ± 0.19                | 0.22 ± 0.003**            | 1.13 (1.08, 1.17)    |
| <b>Sleep onset time (hh:mm)</b>       |                 |                            |                           |                      |
| 2019                                  | 22:59 ± 0:20    | 22:58 ± 00:15              | -00:01 ± 00:01            | -0.03 (-0.07, 0.00)  |
| 2020                                  | 22:58 ± 0:19    | 23:13 ± 00:10              | 00:15 ± 00:01**           | 1.02 (0.98, 1.06)    |
| 18–25 year-olds                       | 23:31 ± 0:24    | 23:58 ± 00:13              | 00:26 ± 00:03**           | 1.58 (1.42, 1.74)    |
| 25–40 year-olds                       | 23:04 ± 0:23    | 23:21 ± 00:13              | 00:16 ± 00:01**           | 1.13 (1.07, 1.18)    |
| 40–55 year-olds                       | 22:49 ± 0:17    | 23:04 ± 00:09              | 00:14 ± 00:01**           | 3.47 (3.39, 3.55)    |
| 55–80 year-olds                       | 22:37 ± 0:13    | 22:47 ± 00:07              | 00:09 ± 00:01**           | 3.18 (3.05, 3.31)    |
| Females                               | 22:46 ± 0:19    | 23:04 ± 00:10              | 00:18 ± 00:01**           | 3.10 (3.01, 3.18)    |
| Males                                 | 23:03 ± 0:19    | 23:17 ± 00:10              | 00:14 ± 00:01**           | 1.10 (1.05, 1.14)    |
| <b>Sleep offset time (hh:mm)</b>      |                 |                            |                           |                      |
| 2019                                  | 06:43 ± 0:30    | 06:40 ± 00:27              | -00:03 ± 00:01            | -0.11 (-0.14, -0.07) |
| 2020                                  | 06:40 ± 0:29    | 07:09 ± 00:21              | 00:29 ± 00:01**           | 1.15 (1.11, 1.18)    |
| 18–25 year-olds                       | 07:24 ± 0:28    | 08:09 ± 00:19              | 00:45 ± 00:04**           | 1.88 (1.71, 2.05)    |
| 25–40 year-olds                       | 06:48 ± 0:31    | 07:20 ± 00:23              | 00:32 ± 00:01**           | 1.17 (1.12, 1.23)    |
| 40–55 year-olds                       | 06:26 ± 0:30    | 06:54 ± 00:21              | 00:27 ± 00:02**           | 1.08 (1.02, 1.15)    |
| 55–80 year-olds                       | 06:25 ± 0:21    | 06:44 ± 00:15              | 00:18 ± 00:02**           | 1.04 (0.93, 1.15)    |
| Females                               | 06:37 ± 0:28    | 07:11 ± 00:21              | 00:34 ± 00:02**           | 1.37 (1.30, 1.45)    |
| Males                                 | 06:41 ± 0:30    | 07:09 ± 00:21              | 00:27 ± 00:01**           | 1.08 (1.04, 1.13)    |

Notes: BL = baseline; PD = physical distancing; SEM = standard error of the mean

\* = p-value <0.05

\*\* = p-value <0.001.

<https://doi.org/10.1371/journal.pone.0256063.t001>

In 2020, average sleep opportunity onset was 15 minutes later during physical distancing when compared to baseline (*moderate effect size*). Average sleep opportunity did not differ for the corresponding time periods in 2019 (*trivial effect size*). In 2020, average sleep opportunity onset was significantly earlier during physical distancing when compared to baseline for 18–25 year-olds (*large effect size*), 25–40 year-olds (*moderate effect size*), 40–55 year-olds (*very large effect size*), 55–80 year-olds (*very large effect size*), females (*very large effect size*), and males (*moderate effect size*) (Table 1). These data are presented in Fig 1.

In 2020, average sleep opportunity offset was significantly later during physical distancing when compared to baseline (*moderate effect size*). Average sleep opportunity offset did not differ for the corresponding time periods in 2019 (*trivial effect size*). In 2020, average sleep opportunity offset was significantly later for 18–25 year-olds (*large effect size*), 25–40 year-olds (*moderate effect size*), 40–55 year-olds (*moderate effect size*), 55–80 year-olds (*moderate effect size*), females (*large effect size*), and males (*moderate effect size*) (Table 1). These data are presented in Fig 1.



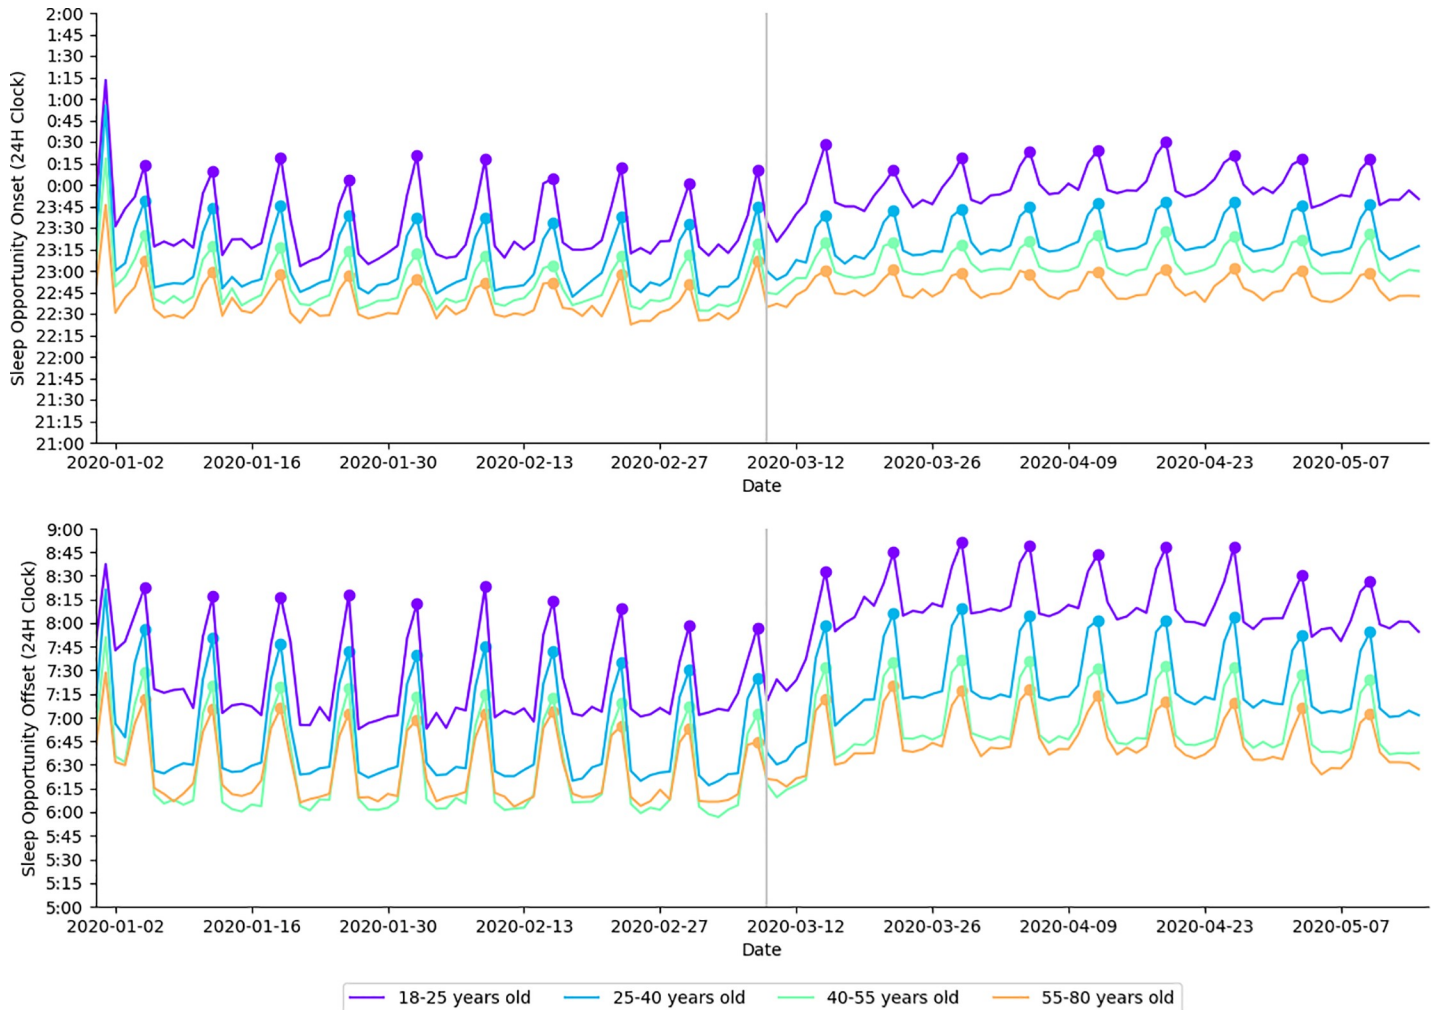

**Fig 1. Daily average sleep opportunity onset time and sleep opportunity offset time in 2020 presented by age cohort.** Each age cohort is plotted in a different color, indicated in the legend. Filled circles indicate Sundays; a gray vertical line separates baseline and physical distancing.

<https://doi.org/10.1371/journal.pone.0256063.g001>

In 2020, average sleep duration was significantly longer during physical distancing when compared to baseline (*moderate effect size*). Average sleep duration was significantly shorter for the corresponding time periods in 2019 (*very large effect size*). In 2020, average sleep duration was significantly longer during physical distancing when compared to baseline for 18–25 year-olds (*very large effect size*), 25–40 year-olds (*large effect size*), 40–55 year-olds (*large effect size*), 55–80 year-olds (*moderate effect size*), females (*large effect size*), and males (*large effect size*) (Table 2). These data are presented in Fig 2.

In 2020, average social jet lag was significantly reduced during physical distancing when compared to baseline (*large effect size*). Average social jet lag did not differ for the corresponding time periods in 2019 (*small effect size*). In 2020, average social jet lag was significantly reduced during physical distancing when compared to baseline for 18–25 year-olds (*very large effect size*), 25–40 year-olds (*very large effect size*), 40–55 year-olds (*very large effect size*), 55–80 year-olds (*large effect size*), females (*large effect size*), and males (*large effect size*) (Table 2).

Table 2. Objective sleep outcomes as a function of time period.

| Variable                      | Time period     |                            | Outcomes                  |                      |
|-------------------------------|-----------------|----------------------------|---------------------------|----------------------|
|                               | Baseline (M±SD) | Physical distancing (M±SD) | Difference (PD-BL; M±SEM) | Effect size (95% CL) |
| <b>Sleep duration (hours)</b> |                 |                            |                           |                      |
| 2019                          | 7.25 ± 0.19     | 7.11 ± 0.22                | -0.14 ± 0.003**           | -0.68 (-0.72, -0.64) |
| 2020                          | 6.90 ± 0.17     | 7.10 ± 0.16                | 0.21 ± 0.009**            | 1.18 (1.07, 1.29)    |
| 18–25 year-olds               | 7.12 ± 0.15     | 7.41 ± 0.15                | 0.29 ± 0.003**            | 1.93 (1.81, 2.05)    |
| 25–40 year-olds               | 6.98 ± 0.17     | 7.21 ± 0.16                | 0.23 ± 0.004**            | 1.39 (1.32, 1.45)    |
| 40–55 year-olds               | 6.80 ± 0.22     | 6.98 ± 0.18                | 0.18 ± 0.008**            | 0.85 (0.76, 0.95)    |
| 55–80 year-olds               | 6.73 ± 0.16     | 6.85 ± 0.15                | 0.12 ± 0.004**            | 0.78 (0.69, 0.88)    |
| Females                       | 6.81 ± 0.18     | 7.01 ± 0.17                | 0.19 ± 0.003**            | 1.16 (1.10, 1.22)    |
| Males                         | 7.10 ± 0.18     | 7.33 ± 0.16                | 0.23 ± 0.003**            | 1.35 (1.30, 1.40)    |
| <b>Social jet lag (hours)</b> |                 |                            |                           |                      |
| 2019                          | 0.50 ± 0.22     | 0.56 ± 0.10                | 0.06 ± 0.002              | 0.35 (0.31, 0.39)    |
| 2020                          | 0.51 ± 0.22     | 0.38 ± 0.07                | -0.13 ± 0.002**           | -0.80 (-0.83, -0.76) |
| 18–25 year-olds               | 0.67 ± 0.26     | 0.41 ± 0.13                | -0.26 ± 0.012**           | -1.26 (-1.43, -1.10) |
| 25–40 year-olds               | 0.62 ± 0.24     | 0.47 ± 0.09                | -0.15 ± 0.004**           | -0.83 (-0.88, -0.77) |
| 40–55 year-olds               | 0.43 ± 0.20     | 0.34 ± 0.07                | -0.09 ± 0.003**           | -0.60 (-0.67, -0.54) |
| 55–80 year-olds               | 0.33 ± 0.16     | 0.25 ± 0.04                | -0.08 ± 0.005**           | -0.69 (-0.80, -0.57) |
| Females                       | 0.50 ± 0.22     | 0.37 ± 0.08                | -0.13 ± 0.004**           | -0.79 (-0.86, -0.71) |
| Males                         | 0.52 ± 0.21     | 0.39 ± 0.07                | -0.13 ± 0.003**           | -0.83 (-0.88, -0.79) |

Notes: BL = baseline; PD = physical distancing; SEM = standard error of the mean

\* = p-value <0.05

\*\* = p-value <0.001.

<https://doi.org/10.1371/journal.pone.0256063.t002>

## Exercise

Summaries of exercise behavior for age and gender cohorts are presented in Table 3 and Fig 3. In 2020, exercise frequency increased during physical distancing when compared to baseline (*small effect size*). There was no difference in exercise intensity for the corresponding time periods in 2019 (*trivial effect size*). In 2020, exercise frequency decreased between baseline and physical distancing for 18–25 year-olds (*small effect size*), but increased for 25–40 year-olds (*small effect size*), 40–55 year-olds (*moderate effect size*), 55–80 year-olds (*moderate effect size*), females (*small effect size*), and males (*moderate effect size*; Table 3). These data are presented in Fig 3.

In 2020, individuals spent less time in HR zone 2 (*moderate effect size*) and HR zone 3 (*large effect size*); and spent more time in HR zone 1 (*small effect size*), HR zone 4 (*small effect size*), HR zone 5 (*moderate effect size*), and HR zone 6 (*moderate effect size*) during physical distancing compared to baseline (Table 4). For the corresponding periods in 2019, individuals spent less time in HR zone 1 (*large effect size*) and HR zone 2 (*small effect size*); and more time in HR zone 3 (*moderate effect size*), HR zone 4 (*small effect size*), HR zone 5 (*small effect size*) and HR zone 6 (*moderate effect size*). These data are presented in Fig 4.

## Cardiovascular indicators of health

A summary of cardiovascular outcomes for age and gender cohorts are presented in Table 5. In 2020, average RHR was lower during physical distancing when compared to baseline (*large effect size*). For the corresponding periods in 2019, average RHR was also lower (*moderate effect size*). In 2020, average RHR was lower during physical distancing when compared to

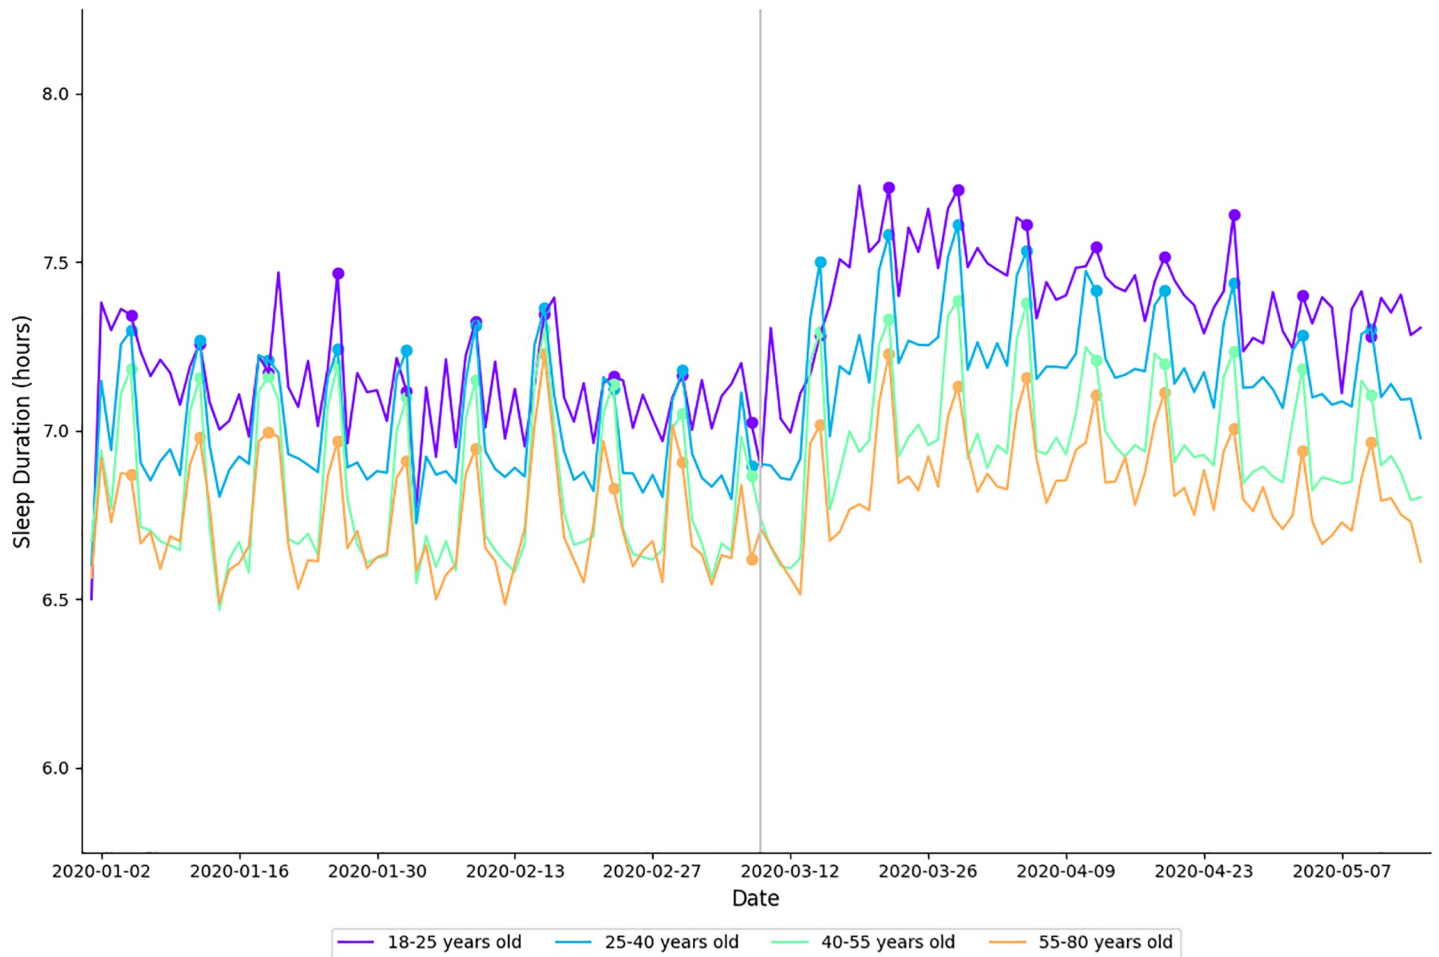

**Fig 2. Daily average sleep duration in 2020 aggregated by age cohort.** Each cohort is plotted in a different color, indicated in the legend. Filled circles indicate Sundays; a vertical gray line separates baseline and physical distancing.

<https://doi.org/10.1371/journal.pone.0256063.g002>

**Table 3. Daily percentage of users that engaged in exercise (i.e., exercise frequency) as a function of time period.**

| Cohort             | Exercise frequency (%) |                            | Outcomes                  |                      |
|--------------------|------------------------|----------------------------|---------------------------|----------------------|
|                    | Baseline (M±SD)        | Physical distancing (M±SD) | Difference (PD-BL; M±SEM) | Effect size (95% CL) |
| 2019               | 66.98 ± 4.14           | 67.0 ± 4.67                | 0.02 ± 0.06               | 0.00 (-0.03, 0.04)   |
| 2020               | 59.9 ± 4.04            | 61.91 ± 4.36               | 2.01 ± 0.06**             | 0.48 (0.44, 0.52)    |
| <b>Age (years)</b> |                        |                            |                           |                      |
| 18–25 year-olds    | 65.62 ± 10.44          | 62.83 ± 8.22               | -2.79 ± 0.05**            | -0.30 (-0.45, -0.14) |
| 25–40 year-olds    | 60.09 ± 5.01           | 61.7 ± 4.77                | 1.61 ± 0.10*              | -0.80 (-0.86, -0.75) |
| 40–55 year-olds    | 58.72 ± 3.31           | 61.85 ± 4.33               | 3.13 ± 0.09**             | 0.46 (0.39, 0.52)    |
| 55–80 year-olds    | 59.27 ± 2.75           | 62.17 ± 5.14               | 2.89 ± 0.16**             | 0.84 (0.73, 0.95)    |
| <b>Sex</b>         |                        |                            |                           |                      |
| Females            | 63.29 ± 5.49           | 65.43 ± 5.16               | 2.14 ± 0.14*              | 1.16 (1.08, 1.23)    |
| Males              | 58.53 ± 3.61           | 60.45 ± 4.21               | 1.92 ± 0.06**             | -0.72 (-0.77, -0.68) |

Notes: BL = baseline; PD = physical distancing; SEM = standard error of the mean

\* = p-value <0.05

\*\* = p-value <0.001.

<https://doi.org/10.1371/journal.pone.0256063.t003>



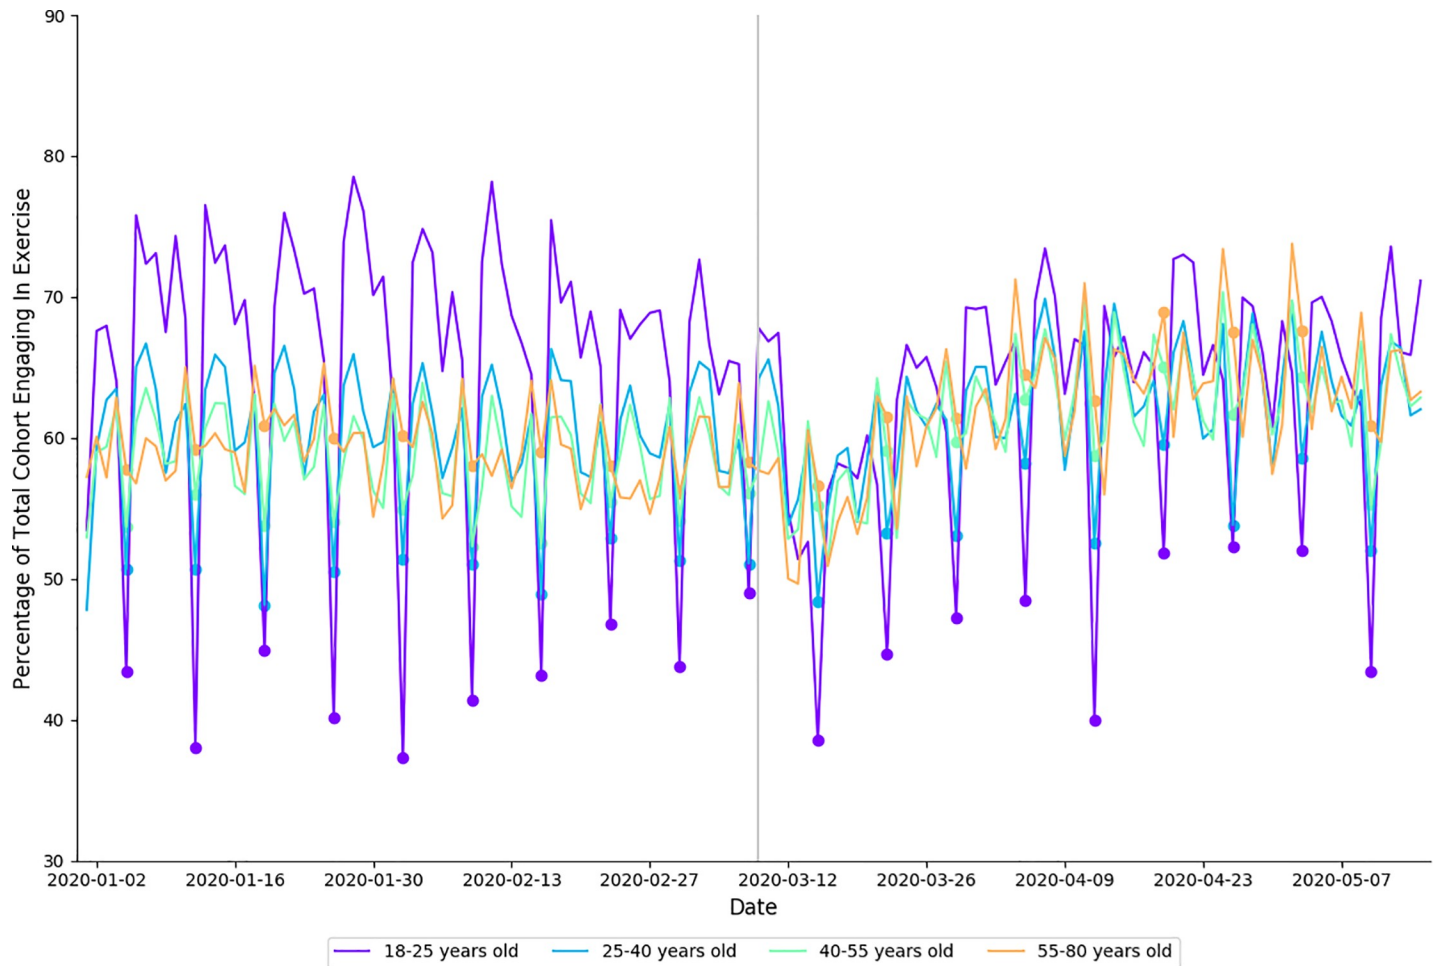

**Fig 3. Percentage of each age cohort in 2020 that logged an exercise session, by date.** Each cohort is shown in a different color, indicated in the legend. Filled circles indicate Sundays, a vertical gray line separates baseline from physical distancing.

<https://doi.org/10.1371/journal.pone.0256063.g003>

baseline for 18–25 year-olds (*moderate effect size*), 25–40 year-olds (*moderate effect size*), 40–55 year-olds (*large effect size*), 55–80 year-olds (*large effect size*), females (*large effect size*), and males (*large effect size*) (Table 5). These data are presented in Fig 5.

In 2020, average HRV was higher during physical distancing when compared to baseline (*large effect size*). Average HRV increased over the corresponding time periods in 2019 (*moderate effect size*). In 2020, average HRV was higher during physical distancing when compared to baseline for 18–25 year-olds (*moderate effect size*), 25–40 year-olds (*moderate effect size*), 40–55 year-olds (*large effect size*), 55–80 year-olds (*large effect size*), females (*large effect size*), and males (*large effect size*) (Table 5). These data are presented in Fig 5.

### Comparison of 2019 and 2020

A comparison of changes to sleep and exercise variables during designated time periods (i.e., BL-PD) between 2019 and 2020 are presented in Table 6. Subjects significantly increased sleep opportunity duration (*large effect size*), delayed sleep offset time (*moderate effect size*), had an earlier sleep offset time (*moderate effect size*), increased sleep duration (*large effect size*) and reduced social jet lag (*moderate effect size*) during PD in 2020 when compared to the shift in

Table 4. Distribution of exercise intensity as a function of time period.

| HR Zone | Time period     |                            | Outcomes                  |                      |
|---------|-----------------|----------------------------|---------------------------|----------------------|
|         | Baseline (M±SD) | Physical distancing (M±SD) | Difference (PD-BL; M±SEM) | Effect size (95% CL) |
| 2019    |                 |                            |                           |                      |
| Zone 1  | 11.94 ± 0.51    | 10.94 ± 0.93               | -1.00 ± 0.01**            | -1.33 (-1.37, -1.29) |
| Zone 2  | 21.43 ± 1.08    | 20.82 ± 1.19               | -0.61 ± 0.015**           | -0.54 (-0.57, -0.50) |
| Zone 3  | 28.84 ± 0.57    | 29.25 ± 0.51               | 0.41 ± 0.007**            | 0.76 (0.72, 0.80)    |
| Zone 4  | 24.28 ± 0.86    | 24.80 ± 1.06               | 0.52 ± 0.013**            | 0.54 (0.50, 0.58)    |
| Zone 5  | 12.22 ± 0.95    | 12.77 ± 1.14               | 0.55 ± 0.014**            | 0.52 (0.49, 0.56)    |
| Zone 6  | 1.30 ± 0.15     | 1.42 ± 0.19                | 0.12 ± 0.002**            | 0.70 (0.66, 0.74)    |
| 2020    |                 |                            |                           |                      |
| Zone 1  | 11.66 ± 0.80    | 12.09 ± 1.18               | 0.43 ± 0.014*             | 0.43 (0.39, 0.46)    |
| Zone 2  | 20.32 ± 1.17    | 19.54 ± 0.91               | -0.78 ± 0.014**           | -0.74 (-0.78, -0.71) |
| Zone 3  | 27.73 ± 0.62    | 26.58 ± 0.54               | -1.15 ± 0.008**           | -1.98 (-2.02, -1.94) |
| Zone 4  | 25.54 ± 1.12    | 25.98 ± 1.19               | 0.44 ± 0.016*             | 0.38 (0.34, 0.42)    |
| Zone 5  | 13.42 ± 1.11    | 14.33 ± 0.69               | 0.91 ± 0.013**            | 0.98 (0.95, 1.02)    |
| Zone 6  | 1.33 ± 0.16     | 1.48 ± 0.12                | 0.15 ± 0.002**            | 1.06 (1.02, 1.10)    |

Notes: BL = baseline; PD = physical distancing; SEM = standard error of the mean

\* = p-value <0.05

\*\* = p-value <0.001.

<https://doi.org/10.1371/journal.pone.0256063.t004>

the corresponding time periods in 2019 (Table 6). Subjects increased exercise frequency (*very large effect size*) during PD in 2020 when compared to the changes seen in the corresponding time periods in 2019. For exercise intensity, subjects significantly decreased the proportion of time spent in zones 2 (*trivial effect size*), 3 (*very large effect size*) and 6 (*trivial effect sizes*), and significantly increased the proportion of time spent in zones 1 (*large effect size*), and 5 (*small effect size*) during PD in 2020 when compared to the changes in the corresponding time periods in 2019. The reduction in RHR seen in 2020 was significantly larger (*small effect size*) compared to 2019, while a more significant increase in HRV (*moderate effect size*) was found during PD in 2019 when compared to in 2020.

## Discussion

The aims of this study were to quantify changes to sleep/wake behavior and exercise behavior, as well as changes in physiological markers of health during COVID-19 physical distancing. A retrospective analysis of sleep and activity patterns was conducted covering January 1, 2020 through May 15, 2020 including 5,436 US-based WHOOP members. Given that the time-frames in the study included changes of season and daylight saving, a corresponding dataset from 2019 was included to provide additional context. Findings were divided into sleep, activity, and cardiovascular indicators of health and are discussed below.

### Sleep

The primary sleep related findings were (1) sleep onset shifted later during physical distancing; (2) average sleep duration increased in all age and gender cohorts during physical distancing and (3) social jet lag—i.e., weekday-to-weekend variability of sleep opportunity onset and offset—decreased for all gender and age cohorts during physical distancing.

Along with increased sleep opportunity duration during physical distancing, an apparent shift towards a later sleep onset and offset during physical distancing was evident. It appears

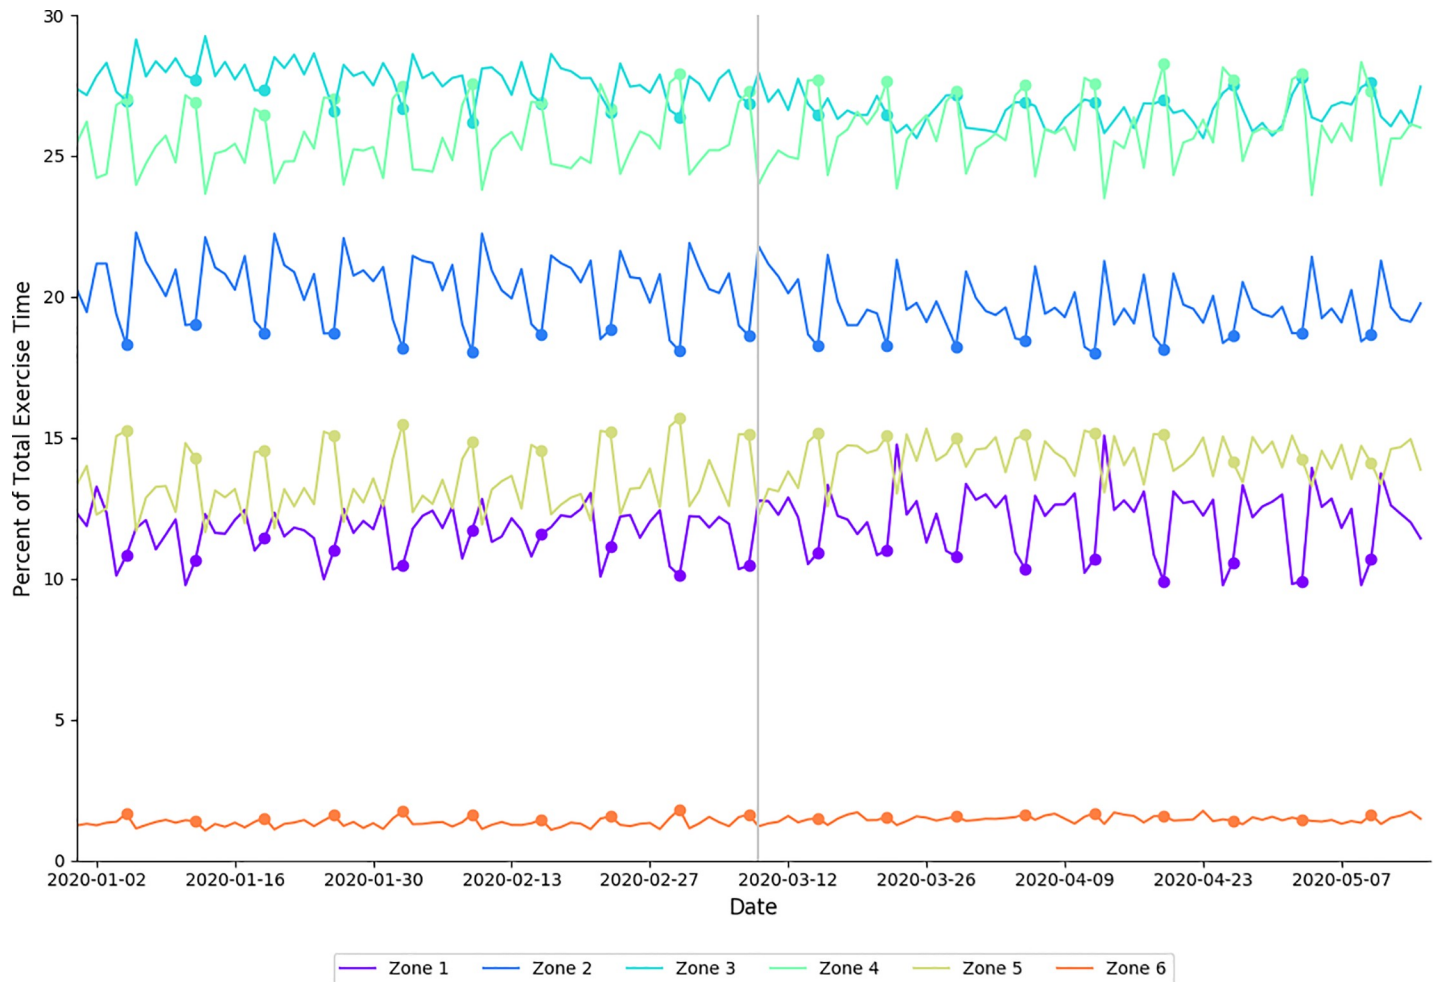

**Fig 4. Distribution of proportion of total exercise time spent in each heart rate zone in 2020, arranged by date.** Each heart rate zone is shown in a different color, indicated by the legend. Filled circles indicate Sundays; the vertical gray line delineates between baseline and physical distancing.

<https://doi.org/10.1371/journal.pone.0256063.g004>

that subjects were able to obtain more sleep by delaying sleep offset. It can be suggested that this behavioral change may be due to reduced morning commitments during physical distancing (e.g., commute). The shifts seen in 2019 support this finding, with the same subjects exhibiting earlier wake times (Table 1) and less total sleep in the corresponding periods (Table 2). A similar delay in sleep timing during COVID-19 restrictions have been reported in multiple survey-based studies [26–28]. In regard to changes among age cohorts, 18–25 year-olds experienced the largest delay their sleep offset time. This finding reflects the established differences in chronobiology across age cohorts—younger individuals tend to have a late chronotype while older individuals skew towards an earlier chronotype [29]. Given that school and collegiate based commitments likely reduced during physical distancing—the data suggests that teenagers and young adults returned to a more chronobiologically suitable sleep period (i.e., go to bed late, wake up late).

In addition to exhibiting differences in the magnitude of average sleep timing shifts, Fig 1 highlights a significant reduction in the social jet lag during physical distancing. In contrast, there were no differences in social jet lag in 2019. It is likely that the reduction in social jet lag seen in 2020 were due to restrictions on social or extra-curricular activities during physical

Table 5. Cardiovascular outcomes as a function of time period.

| Variable                           | Time period     |                            | Outcomes                  |                      |
|------------------------------------|-----------------|----------------------------|---------------------------|----------------------|
|                                    | Baseline (M±SD) | Physical distancing (M±SD) | Difference (PD-BL; M±SEM) | Effect size (95% CL) |
| <b>Resting heart rate (bpm)</b>    |                 |                            |                           |                      |
| 2019                               | 55.15 ± 0.8     | 54.64 ± 0.76               | -0.51 ± 0.011**           | -0.65 (-0.69, -0.62) |
| 2020                               | 55.09 ± 0.81    | 54.2 ± 0.55                | -0.90 ± 0.009**           | -1.29 (-1.32, -1.25) |
| 18–25 year-olds                    | 53.82 ± 1.06    | 52.98 ± 0.58               | -0.84 ± 0.048**           | -0.98 (-1.14, -0.82) |
| 25–40 year-olds                    | 54.26 ± 0.97    | 53.31 ± 0.61               | -0.95 ± 0.016**           | -1.17 (-1.23, -1.12) |
| 40–55 year-olds                    | 56.11 ± 0.68    | 55.24 ± 0.53               | -0.87 ± 0.014**           | -1.43 (-1.49, -1.36) |
| 55–80 year-olds                    | 56.21 ± 0.52    | 55.35 ± 0.47               | -0.86 ± 0.020**           | -1.74 (-1.85, -1.62) |
| Females                            | 56.74 ± 0.77    | 55.89 ± 0.52               | -0.84 ± 0.017**           | -1.29 (-1.37, -1.22) |
| Males                              | 54.43 ± 0.85    | 53.5 ± 0.58                | -0.93 ± 0.012**           | -1.28 (-1.32, -1.23) |
| <b>Heart rate variability (ms)</b> |                 |                            |                           |                      |
| 2019                               | 61.31 ± 2.04    | 64.28 ± 4.2                | 2.97 ± 0.045**            | 0.90 (0.86, 0.94)    |
| 2020                               | 65.85 ± 2.28    | 66.82 ± 1.4                | 0.98 ± 0.026**            | 0.51 (0.47, 0.55)    |
| 18–25 year-olds                    | 93.77 ± 4.25    | 93.87 ± 2.35               | 0.09 ± 0.193              | 0.03 (-0.13, 0.19)   |
| 25–40 year-olds                    | 74.26 ± 2.77    | 75.58 ± 1.69               | 1.32 ± 0.045**            | 0.58 (0.52, 0.63)    |
| 40–55 year-olds                    | 54.15 ± 1.52    | 55.11 ± 1.12               | 0.96 ± 0.031**            | 0.72 (0.65, 0.78)    |
| 55–80 year-olds                    | 50.99 ± 1.56    | 51.98 ± 1.15               | 0.99 ± 0.054**            | 0.72 (0.61, 0.83)    |
| Females                            | 67.35 ± 2.2     | 68.4 ± 1.48                | 1.05 ± 0.048**            | 0.56 (0.49, 0.63)    |
| Males                              | 65.24 ± 2.34    | 66.18 ± 1.44               | 0.94 ± 0.031**            | 0.48 (0.44, 0.53)    |

Notes: BL = baseline; PD = physical distancing; bpm = beats per minute; ms = milliseconds

\* = p-value <0.05

\*\* = p-value <0.001.

<https://doi.org/10.1371/journal.pone.0256063.t005>

distancing. As may be expected, this was most prominent in the younger cohorts, with larger reductions seen when compared to older cohorts (Table 2). In support of our findings, a recent global survey of 11,431 adults from 40 countries found that social jet lag reduced by approximately 30 minutes during physical distancing restrictions [27].

Average nightly sleep duration in 2020 was significantly higher during physical distancing than during baseline for all age cohorts (Fig 1). This finding is in contrast to the reduction in sleep duration seen in 2019 (Table 6)—suggesting that this change was likely due to the shifts in sleep/wake behavior experienced during physical distancing. Once again, larger changes were seen in the younger age cohorts (i.e., 18–25 year old's). These findings suggest that physical distancing may have alleviated societal factors (e.g., work or academic commitments, commuting) that restrict sleep opportunity, allowing individuals to revert towards biological sleep/wake preferences. Practical applications can be made across all age cohorts; however, the data highlight important changes in behavior amongst the 18–25 year-old cohort. As mentioned above, individuals from this age cohort typically have late chronotypes (i.e., their circadian drive for sleep initiates later in the night). However, they are often expected to fulfil academic or sport related commitments early in the morning—decreasing opportunity for sleep. Prior literature has demonstrated subjective and objective benefits associated with even minor extension to average sleep duration when sustained over time; a 2018 study by Lo et al. [30] showed that 10 minutes of extended sleep duration in secondary school students correlated with improved alertness and mental health. These findings show that despite their typically late chronotype, 18–25 year-olds will shift their sleep offset later if given the opportunity. In addition to improvements in cognition, sleep extensions have been shown to correspond with statistically significant reductions in systolic blood pressure [31].

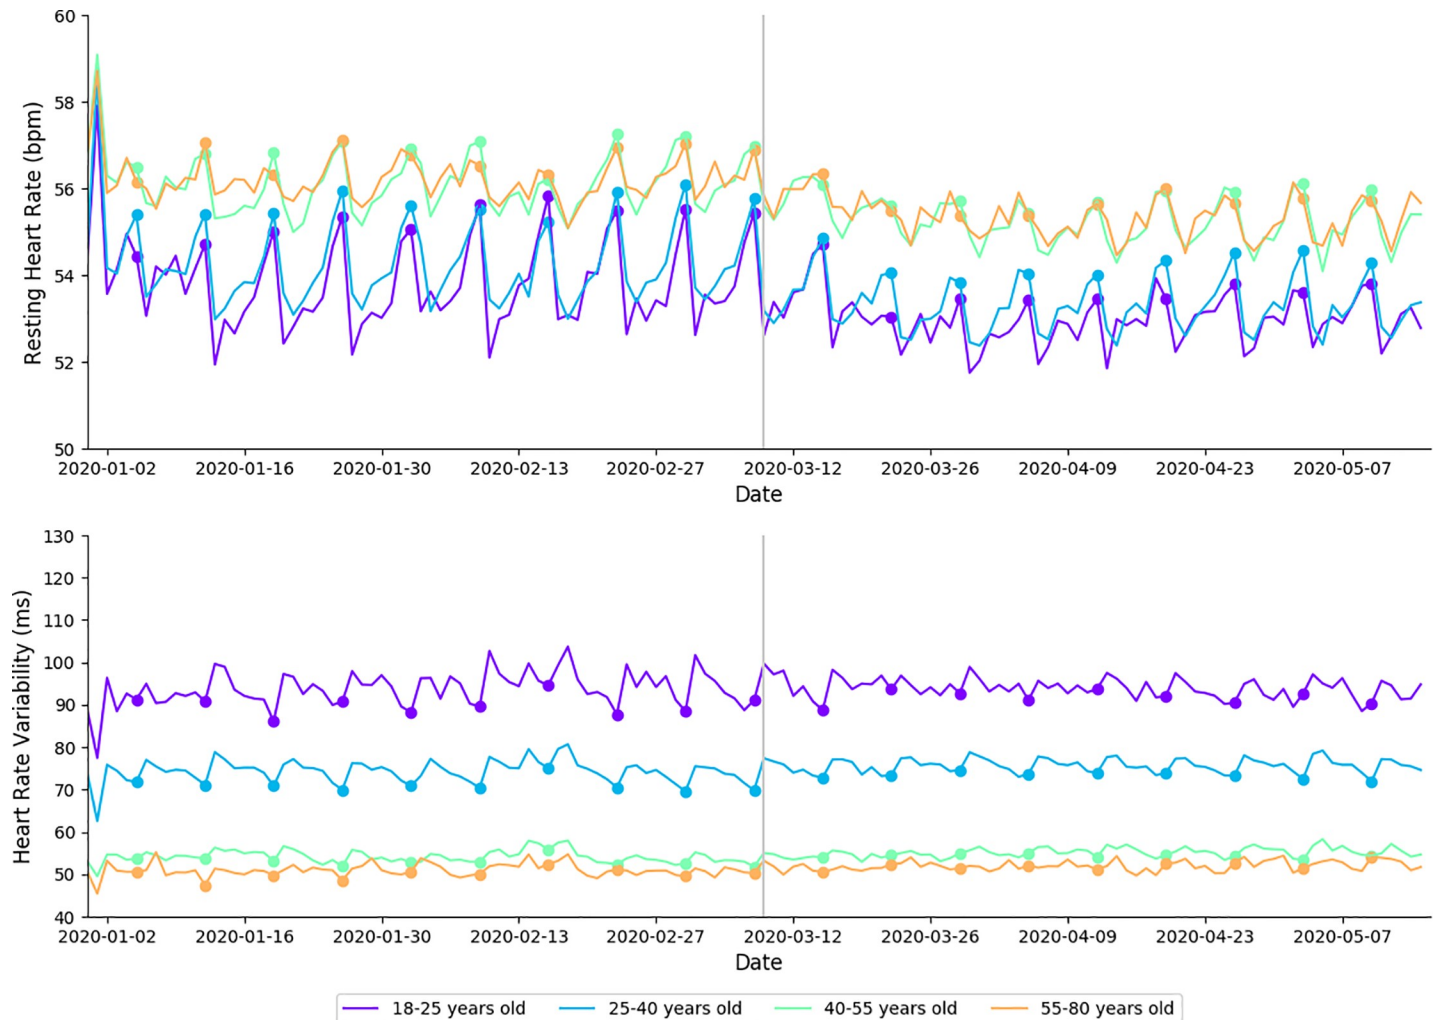

**Fig 5. Changes in RHR (top) and HRV (bottom) in 2020 arranged by date and age cohort.** Each cohort is shown with a differently colored line as indicated in the legends. bpm = beats per minute; ms = milliseconds. Filled circles indicate Sundays; a gray vertical line separates baseline from physical distancing.

<https://doi.org/10.1371/journal.pone.0256063.g005>

## Exercise

The primary exercise findings were that (1) a higher proportion of individuals performed exercise during physical distancing; (2) individuals increased exercise intensity during physical distancing, and (3) individuals changed the types of athletic activities they were performing during physical distancing. The changes in activities observed are consistent with adherence to bans on gatherings of more than 10 people and closures of athletic facilities such as fitness clubs and gyms. Coincidentally, athletic activities that are compliant with physical distancing appear to be those that also require high cardiovascular load (i.e., running, cycling). This is supported by a decrease in weightlifting and increases in activities like running (Fig 6). This increase may be due to the minimal equipment needs (e.g., pair of sneakers for running), and that individuals are likely to prioritize outdoor activities whilst confined to their homes for much of each day. Previous studies suggest that engagement in new exercise modalities may increase exercise intensity [32], improve athletic performance and improve cardiovascular health [33, 34]. Therefore, alterations to training stimulus (i.e., exercise modality), and the



**Table 6. Differences in sleep and exercise related variables as a function of year.**

| Variable                       | Year               |                    | Outcomes                      |                      |
|--------------------------------|--------------------|--------------------|-------------------------------|----------------------|
|                                | 2019 (PD-BL; M±SD) | 2020 (PD-BL; M±SD) | Difference (2020–2019; M±SEM) | Effect size (95% CL) |
| Sleep opportunity duration (h) | -0.05 ± 0.20       | 0.24 ± 0.19        | 0.29 ± 0.003**                | 1.49 (1.45, 1.53)    |
| Sleep onset time (hh:mm)       | 00:00 ± 0:18       | 00:15 ± 0:15       | 00:15 ± 00:00**               | 0.91 (0.87, 0.94)    |
| Sleep offset time (hh:mm)      | -00:03 ± 0:28      | 00:29 ± 0:25       | -00:26 ± 00:00**              | 0.98 (0.94, 1.02)    |
| Sleep duration (h)             | -0.14 ± 0.20       | 0.21 ± 0.17        | 0.35 ± 0.003**                | 1.89 (1.85, 1.93)    |
| Social jet lag (h)             | 0.00 ± 0.20        | -0.20 ± 0.20       | -0.20 ± 0.003                 | -1.00 (-1.04, -0.96) |
| Exercise frequency (%)         | 0.02 ± 0.04        | 2.01 ± 0.04        | 1.99 ± 0.001**                | 49.75 (49.38, 50.12) |
| Exercise intensity             |                    |                    |                               |                      |
| Zone 1 (%)                     | -1.00 ± 0.75       | 0.43 ± 1.0         | 1.43 ± 0.012**                | 1.62 (1.58, 1.66)    |
| Zone 2 (%)                     | -0.61 ± 1.13       | -0.78 ± 1.04       | -0.17 ± 0.015**               | -0.16 (-0.19, -0.12) |
| Zone 3 (%)                     | 0.41 ± 0.54        | -1.15 ± 0.58       | -1.56 ± 0.007**               | -2.78 (-2.83, -2.74) |
| Zone 4 (%)                     | 0.52 ± 0.96        | 0.44 ± 1.15        | -0.08 ± 0.014                 | -0.08 (-0.11, -0.04) |
| Zone 5 (%)                     | 0.55 ± 1.04        | 0.91 ± 0.92        | 0.36 ± 0.013**                | 0.37 (0.33, 0.40)    |
| Zone 6 (%)                     | 0.12 ± 0.17        | 0.15 ± 0.14        | 0.03 ± 0.002                  | 0.19 (0.16, 0.23)    |
| RHR (bpm)                      | -0.51 ± 0.78       | -0.90 ± 0.69       | -0.39 ± 0.010**               | -0.53 (-0.57, -0.49) |
| HRV (ms)                       | 2.97 ± 3.27        | 0.98 ± 1.87        | -1.99 ± 0.036**               | -0.75 (-0.79, -0.71) |

Notes: BL = baseline; PD = physical distancing; bpm = beats per minute; ms = milliseconds

\* = p-value <0.05

\*\* = p-value <0.001.

<https://doi.org/10.1371/journal.pone.0256063.t006>

associated physiological adaptations, may be an unexpected side effect of physical distancing restrictions.

In addition to changes in exercise modalities performed, our data show that individuals exercised more intensely during physical distancing (Fig 4). In 2020, the highest three heart rate zones (collectively, 70–100% HRR) occupy a larger proportion of total exercise time during physical distancing than they did during baseline (Table 4). Similar increases were seen in Zones 4, 5 and 6 in 2019, however there was a significantly larger shift seen in Zone 5 during 2020 (Table 6). In 2020, distributions in relative time spent in heart rate zones 2 through 5 show a cyclical pattern with a 7-day period that is more pronounced during baseline than physical distancing; relatively more time is spent in zones 4, 5, and 6 on weekends, while more time is spent in zones 2 and 3 on weekdays (Fig 4). The differentiation between weekend and weekday heart rate zone distributions is less pronounced in all heart rate zones during physical distancing than it was during baseline. This suggests that individuals were performing more intense exercise on weekdays during physical distancing when compared to baseline. An increase in time spent in these higher heart rate zones may mean an increase in anaerobic training, which has been previously demonstrated to reduce RHR and improve endurance [35]. The present study highlights changes in exercise modality and increases in exercise intensity in this subset of WHOOP users during physical distancing restrictions. Irrespective of physical distancing mandates, it is physiologically sound to suggest that such behaviors, if sustained, should result in improved health outcomes [36].

### Cardiovascular indicators of health

The main finding regarding cardiovascular indicators of health was that average RHR decreased and HRV increased during physical distancing (Fig 3). Both outcomes represent an improvement in cardiovascular health—however it should be noted that similar shifts were

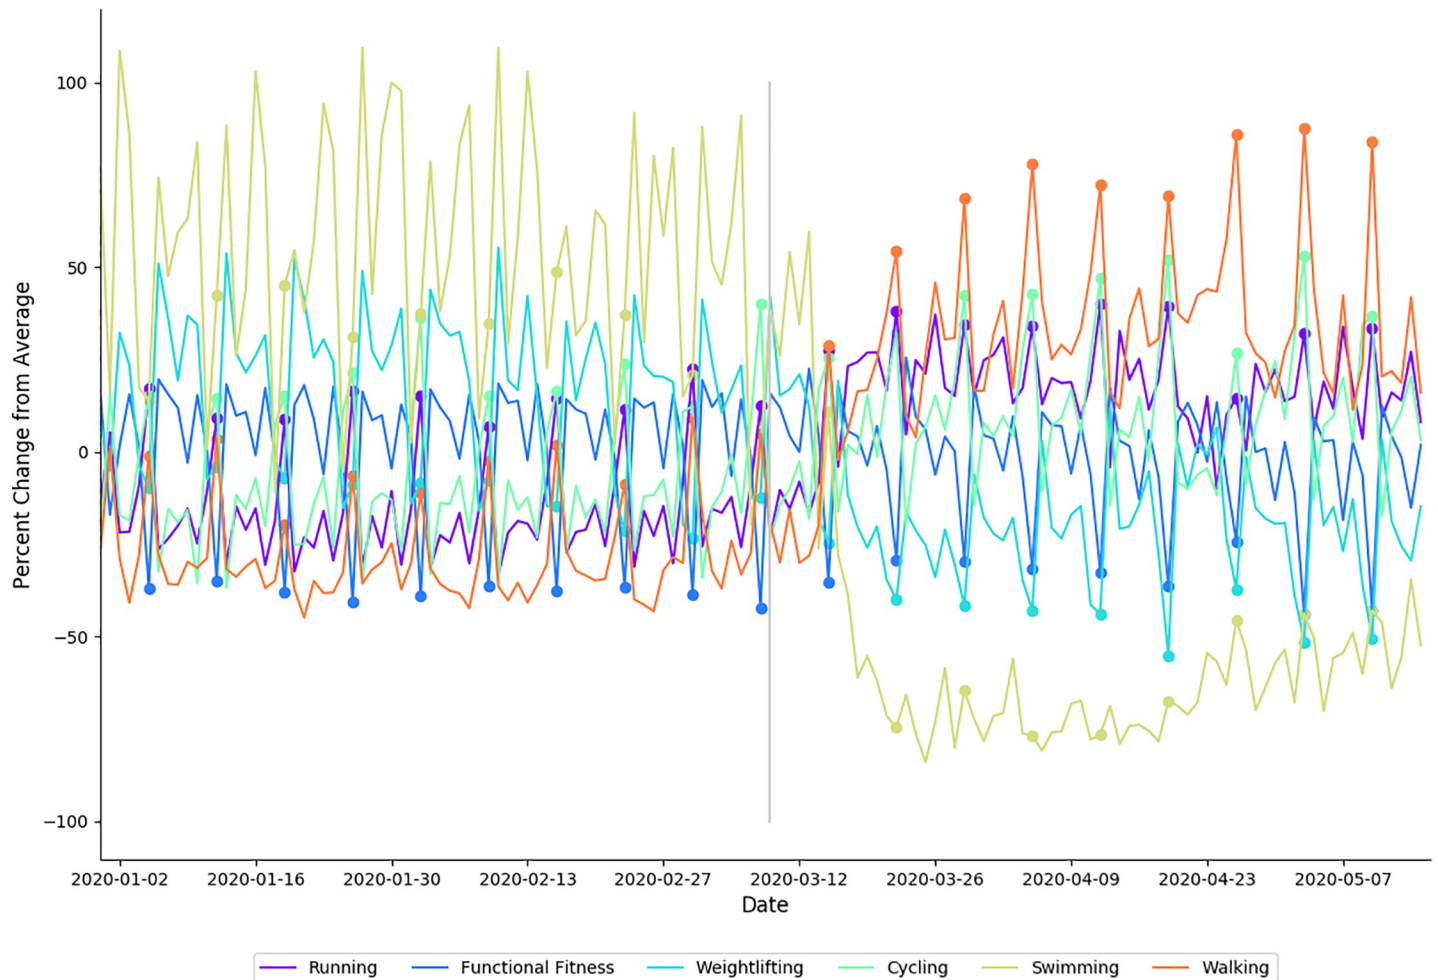

**Fig 6. Percentage of change from average for the six most popular exercise modalities.** Each modality is shown with a differently colored line as indicated in the legends. Filled circles indicate Sundays; a gray vertical line separates baseline from physical distancing.

<https://doi.org/10.1371/journal.pone.0256063.g006>

seen in 2019. In particular, the increase in HRV seen in 2019 was larger than the increase seen in 2020 (Table 6). While the mechanisms behind these differences are unclear, HRV is known to be sensitive to changes in a range of behavioral factors (e.g., exposure to novel training stimuli, alcohol consumption; overtraining). A possible explanation for the smaller increase seen in 2020 may be that increased exercise intensity during physical distancing increased the contribution of the sympathetic nervous system—therefore resulting smaller acute increases in HRV.

For RHR, there was a larger reduction in 2020 compared to 2019, suggesting that changes to sleep and exercise behaviors during physical distancing may have had positive benefits on cardiovascular health. Analysis of the baseline period shows expected moderate differences across age cohorts in which younger individuals show signs of greater cardiovascular fitness than older cohorts. While it is well documented that HRV declines with age [37, 38], previous studies have demonstrated no age-related increase in RHR. For example, Kostis et al [39] found no relationship between age and RHR; this apparent discrepancy may be related to the small effect size and the relatively small datasets of previous studies. Therefore, a novel finding of the present study is that older cohorts presented with progressively higher RHR.

## Limitations and boundary conditions

Interpretations of the present results must be made with consideration to the boundary conditions. The WHOOP user demographic is likely to be more health conscious, have a higher socioeconomic status and are more likely to have the ability to work from home. The findings of this study may not be representative of global changes in behavior due to all individuals being in the United States of America. While it is reasonable to suggest that individuals from this demographic might have decreased professional commitments during physical distancing, it is also possible that exercise opportunity may decrease due to childcare or other at-home commitments. No data were collected regarding the mental health of participants and the severity and/or adherence to physical distancing mandates among the subjects. The date chosen to distinguish between the respective periods was an estimated timeline along which most users would have been subject to some level of physical distancing mandate or recommendation. The high number of statistical comparisons (i.e., multiple testing) and large sample size may have increased the likelihood of significant findings in the analyses. However, Bonferroni corrections were made to reduce the likelihood of type 1 errors due to multiple testing and Cohen's *d* effect sizes were used to assess the magnitude of each effect.

## Conclusions

The aim of this study was to report on the sleep and exercise behavioral changes associated with COVID-19 related physical distancing mandates. During physical distancing, the results showed that individuals: (1) obtained more sleep by delaying sleep offset, (2) reduced social jet lag, (3) exercised more intensely, and (4) altered the type of exercise they were performing. It is reasonable to suggest that decreases in business hours-based commitments (e.g., commuting) may have contributed to the shifts in health related behavior (i.e., exercise and sleep). In regard to cardiovascular outcomes, increased RHR and decreased HRV were observed during physical distancing compared to the baseline period. Given that similar shifts in HRV were seen in the previous year, it is unclear whether these changes in cardiovascular outcomes were specifically related to physical distancing restrictions. However, if participants sustained the behavior changes seen during physical distancing, it is reasonable to suggest that cardiovascular indicators of health (i.e., RHR and HRV) would continue to improve. In the context of a post-pandemic society, it is important to understand how changes to how business, academia and other professional commitments (e.g., ability to work from home) may allow individuals more opportunity to engage in health enhancing behaviors. Future research will be required as countries begin to reopen to investigate which behaviors are maintained, how these behaviors impact mental health, and if cohorts return to their previous behaviors.

## Author Contributions

**Conceptualization:** Emily R. Capodilupo.

**Data curation:** Emily R. Capodilupo.

**Formal analysis:** Emily R. Capodilupo, Dean J. Miller.

**Methodology:** Emily R. Capodilupo, Dean J. Miller.

**Software:** Emily R. Capodilupo.

**Visualization:** Emily R. Capodilupo, Dean J. Miller.

**Writing – original draft:** Emily R. Capodilupo.

**Writing – review & editing:** Emily R. Capodilupo, Dean J. Miller.

## References

1. Coronaviridae Study Group of the International Committee on Taxonomy of Viruses. *The species Severe acute respiratory syndrome-related coronavirus: classifying 2019-nCoV and naming it SARS-CoV-2*. Nat Microbiol. 2020; 5(4):536–44. <https://doi.org/10.1038/s41564-020-0695-z> PMID: 32123347.
2. Banks S, Dinges DF. Behavioral and physiological consequences of sleep restriction. J Clin Sleep Med. 2007; 3(5):519–28. PMID: 17803017.
3. Buxton OM, Pavlova M, Reid EW, Wang W, Simonson DC, Adler GK. Sleep restriction for 1 week reduces insulin sensitivity in healthy men. Diabetes. 2010; 59(9):2126–33. <https://doi.org/10.2337/db09-0699> PMID: 20585000.
4. Hsieh SD, Muto T, Murase T, Tsuji H, Arase Y. Association of short sleep duration with obesity, diabetes, fatty liver and behavioral factors in Japanese men. Intern Med. 2011; 50(21):2499–502. <https://doi.org/10.2169/internalmedicine.50.5844> PMID: 22041348.
5. Cappuccio FP, Cooper D, D'Elia L, Strazzullo P, Miller MA. Sleep duration predicts cardiovascular outcomes: a systematic review and meta-analysis of prospective studies. Eur Heart J. 2011; 32(12):1484–92. <https://doi.org/10.1093/eurheartj/ehr007> PMID: 21300732.
6. Zhang J, Paksarian D, Lamers F, Hickie IB, He J, Merikangas KR. Sleep Patterns and Mental Health Correlates in US Adolescents. J Pediatr. 2017; 182:137–43. <https://doi.org/10.1016/j.jpeds.2016.11.007> PMID: 27939122.
7. Kirschen GW, Jones JJ, Hale L. The Impact of Sleep Duration on Performance Among Competitive Athletes: A Systematic Literature Review. Clin J Sport Med. 2018. <https://doi.org/10.1097/JSM.0000000000000622> PMID: 29944513.
8. Arnal PJ, Sauvet F, Leger D, van Beers P, Bayon V, Bougard C, et al. Benefits of Sleep Extension on Sustained Attention and Sleep Pressure Before and During Total Sleep Deprivation and Recovery. Sleep. 2015; 38(12):1935–43. <https://doi.org/10.5665/sleep.5244> PMID: 26194565.
9. Swinbourne R, Miller J, Smart D, Dulson DK, Gill N. The Effects of Sleep Extension on Sleep, Performance, Immunity and Physical Stress in Rugby Players. Sports (Basel). 2018; 6(2). <https://doi.org/10.3390/sports6020042> PMID: 29910346.
10. Phillips AJK, Clerx WM, O'Brien CS, Sano A, Barger LK, Picard RW, et al. Irregular sleep/wake patterns are associated with poorer academic performance and delayed circadian and sleep/wake timing. Sci Rep. 2017; 7(1):3216. <https://doi.org/10.1038/s41598-017-03171-4> PMID: 28607474.
11. Czeisler CA. Duration, timing and quality of sleep are each vital for health, performance and safety. Sleep Health. 2015; 1(1):5–8. <https://doi.org/10.1016/j.sleh.2014.12.008> PMID: 29073414.
12. Wright KP Jr., Hull JT, Hughes RJ, Ronda JM, Czeisler CA. Sleep and wakefulness out of phase with internal biological time impairs learning in humans. J Cogn Neurosci. 2006; 18(4):508–21. <https://doi.org/10.1162/jocn.2006.18.4.508> PMID: 16768357.
13. Vetter C, Devore EE, Wegrzyn LR, Massa J, Speizer FE, Kawachi I, et al. Association Between Rotating Night Shift Work and Risk of Coronary Heart Disease Among Women. JAMA. 2016; 315(16):1726–34. <https://doi.org/10.1001/jama.2016.4454> PMID: 27115377.
14. Schernhammer ES, Laden F, Speizer FE, Willett WC, Hunter DJ, Kawachi I, et al. Rotating night shifts and risk of breast cancer in women participating in the nurses' health study. J Natl Cancer Inst. 2001; 93(20):1563–8. <https://doi.org/10.1093/jnci/93.20.1563> PMID: 11604480.
15. Grier T, Canham-Chervak M, Anderson MK, Bushman TT, Jones BH. The effects of cross-training on fitness and injury in women. US Army Med Dep J. 2015:33–41. PMID: 26101904.
16. Nielsen RO, Parner ET, Nohr EA, Sorensen H, Lind M, Rasmussen S. Excessive progression in weekly running distance and risk of running-related injuries: an association which varies according to type of injury. J Orthop Sports Phys Ther. 2014; 44(10):739–47. <https://doi.org/10.2519/jospt.2014.5164> PMID: 25155475.
17. Patel H, Alkhwam H, Madanieh R, Shah N, Kosmas CE, Vittorio TJ. Aerobic vs anaerobic exercise training effects on the cardiovascular system. World J Cardiol. 2017; 9(2):134–8. <https://doi.org/10.4330/wjcv.v9.i2.134> PMID: 28289526.
18. Berryhill S, Morton CJ, Dean A, Berryhill A, Provencio-Dean N, Patel SI, et al. Effect of Wearables on Sleep in Healthy Individuals: A Randomized Cross-Over Trial and Validation Study. 0(0):jcs.8356. <https://doi.org/10.5664/jcs.8356> PMID: 32043961
19. Aune D, Sen A, o'Hartaigh B, Janszky I, Romundstad PR, Tonstad S, et al. Resting heart rate and the risk of cardiovascular disease, total cancer, and all-cause mortality—A systematic review and dose-response meta-analysis of prospective studies. Nutr Metab Cardiovasc Dis. 2017; 27(6):504–17. <https://doi.org/10.1016/j.numecd.2017.04.004> PMID: 28552551.

20. Thayer JF, Yamamoto SS, Brosschot JF. The relationship of autonomic imbalance, heart rate variability and cardiovascular disease risk factors. *Int J Cardiol.* 2010; 141(2):122–31. <https://doi.org/10.1016/j.ijcard.2009.09.543> PMID: 19910061.
21. Cucinotta D, Vanelli M. WHO Declares COVID-19 a Pandemic. *Acta Biomed.* 2020; 91(1):157–60. <https://doi.org/10.23750/abm.v91i1.9397> PMID: 32191675.
22. Executive Office of the President. Proclamation 9994: Declaring a National Emergency Concerning the Novel Coronavirus Disease (COVID-19) Outbreak. March 13, 2020.
23. Miller DJ, Lastella M, Scanlan AT, Bellenger C, Halson SL, Roach GD, et al. A validation study of the WHOOP strap against polysomnography to assess sleep. *Journal of Sports Sciences.* 2020:1–6. <https://doi.org/10.1080/02640414.2020.1797448> PMID: 32713257
24. Wittman C, Dinich J, Merrow M, Roenneberg T. Social Jetlag: Misalignment of Biological and Social Time. *Chronobiol Int.* 2006; 23(1–2):497–509. <https://doi.org/10.1080/07420520500545979> PMID: 16687322
25. Hopkins WG, Marshall SW, Batterham AM, Hanin J. Progressive statistics for studies in sports medicine and exercise science. *Med Sci Sports Exerc.* 2009; 41(1):3–13. <https://doi.org/10.1249/MSS.0b013e31818cb278> PMID: 19092709.
26. Cellini N, Conte F, De Rosa O, Giganti F, Malloggi S, Reynt M, et al. Changes in sleep timing and subjective sleep quality during the COVID-19 lockdown in Italy and Belgium: age, gender and working status as modulating factors. *Sleep Med.* 2021; 77:112–9. Epub 2020/12/22. <https://doi.org/10.1016/j.sleep.2020.11.027> PMID: 33348298
27. Korman M, Tkachev V, Reis C, Komada Y, Kitamura S, Gubin D, et al. COVID-19-mandated social restrictions unveil the impact of social time pressure on sleep and body clock. *Scientific Reports.* 2020; 10(1):22225. <https://doi.org/10.1038/s41598-020-79299-7> PMID: 33335241
28. Facer-Childs ER, Hoffman D, Tran JN, Drummond SPA, Rajaratnam SMW. Sleep and mental health in athletes during COVID-19 lockdown. *Sleep.* 2021. <https://doi.org/10.1093/sleep/zsaa261> PMID: 33535229
29. Fischer D, Lombardi DA, Marucci-Wellman H, Roenneberg T. Chronotypes in the US—Influence of age and sex. *PLoS One.* 2017; 12(6):e0178782. <https://doi.org/10.1371/journal.pone.0178782> PMID: 28636610.
30. Lo JC, Lee SM, Lee XK, Sasmita K, Chee N, Tandji J, et al. Sustained benefits of delaying school start time on adolescent sleep and well-being. *Sleep.* 2018; 41(6). <https://doi.org/10.1093/sleep/zsy052> PMID: 29648616.
31. Stock AA, Lee S, Nahmod NG, Chang AM. Effects of sleep extension on sleep duration, sleepiness, and blood pressure in college students. *Sleep Health.* 2020; 6(1):32–9. <https://doi.org/10.1016/j.sleh.2019.10.003> PMID: 31753739.
32. Godfrey RJ. Cross-training. *Sports Exercise and Injury.* 1998;(4):50–5.
33. Tanaka H. Effects of cross-training. Transfer of training effects on VO<sub>2</sub>max between cycling, running and swimming. *Sports Med.* 1994; 18(5):330–9. <https://doi.org/10.2165/00007256-199418050-00005> PMID: 7871294.
34. Tanaka H, Swensen T. Impact of resistance training on endurance performance. A new form of cross-training? *Sports Med.* 1998; 25(3):191–200. <https://doi.org/10.2165/00007256-199825030-00005> PMID: 9554029.
35. Hunter GR, McCarthy JP. Pressor Response Associated With High-Intensity Anaerobic Training. *The Physician and Sportsmedicine.* 1983; 11(4):150–62. <https://doi.org/10.1080/00913847.1983.11708515>
36. Cornelissen VA, Verheyden B, Aubert AE, Fagard RH. Effects of aerobic training intensity on resting, exercise and post-exercise blood pressure, heart rate and heart-rate variability. *J Hum Hypertens.* 2010; 24(3):175–82. Epub 2009/06/26. <https://doi.org/10.1038/jhh.2009.51> PMID: 19554028.
37. Schwartz JB, Gibb WJ, Tran T. Aging effects on heart rate variation. *J Gerontol.* 1991; 46(3):M99–106. <https://doi.org/10.1093/geronj/46.3.m99> PMID: 2030273.
38. Jensen-Urstad K, Storck N, Bouvier F, Ericson M, Lindblad LE, Jensen-Urstad M. Heart rate variability in healthy subjects is related to age and gender. *Acta Physiol Scand.* 1997; 160(3):235–41. <https://doi.org/10.1046/j.1365-201X.1997.00142.x> PMID: 9246386.
39. Kostis JB, Moreyra AE, Amendo MT, Di Pietro J, Cosgrove N, Kuo PT. The effect of age on heart rate in subjects free of heart disease. Studies by ambulatory electrocardiography and maximal exercise stress test. *Circulation.* 1982; 65(1):141–5. <https://doi.org/10.1161/01.cir.65.1.141> PMID: 7198013.
